# Supplementary material for: Optimized mixed-domain signal synthesis for broadband impedance spectroscopy measurements on lithium ion cells for automotive applications
Source: Copernicus journal article supplement (doi:10.5194/jsss-6-65-2017), 2017-02-01
Supplement: Supplementary file [file jsss-6-65-2017-supplement-title-page.pdf › jsss-6-65-2017-supplement-title-page.pdf]

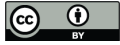

*Supplement of*

## **Optimized mixed-domain signal synthesis for broadband impedance spectroscopy measurements on lithium ion cells for automotive applications**

**Peter Haußmann and Joachim Melbert**

*Correspondence to:* Peter Haußmann ([peter.haussmann@est.rub.de](mailto:peter.haussmann@est.rub.de))

- [jsss-6-65-2017-supplement-title-page.pdf](#)
- [JSSS-2016-51-Supplement.mat](#)

The copyright of individual parts of the supplement might differ from the CC-BY 3.0 licence.
